# Supplementary material for: An in situ formed inorganic conductive network enables high stability and rate capability of single-crystalline nickel-rich cathodes
Source: Royal Society of Chemistry journal article supplement (doi:10.1039/d3ta02538a), 2023-01-01
Supplement: d3ta02538a1.pdf [file d3ta02538a1.pdf]

Electronic Supplementary Information (ESI) for Journal of Materials Chemistry A.

This journal is © The Royal Society of Chemistry 2021

**Supplementary Material: *An in situ* formed inorganic conductive network  
enables high stability and rate capability of single-crystalline nickel-rich  
cathodes**

Xi Chen, †<sup>a</sup> Yu Tang, †<sup>b</sup> Zhibo Zhang,<sup>a</sup> Muhammad Ahmad,<sup>a</sup> Iftikhar Hussain,<sup>a</sup>  
Tianyi Li,<sup>c</sup> Si Lan,<sup>d</sup> Kaili Zhang,<sup>\*a</sup> Qi Liu,<sup>\*b</sup>

<sup>a</sup> Department of Mechanical Engineering, City University of Hong Kong, Hong Kong  
999077, P. R. China

<sup>b</sup> Department of Physics, City University of Hong Kong, Hong Kong 999077, P. R.  
China

<sup>c</sup> Argonne National Laboratory, X-Ray Science Division, Argonne Illinois 60439, USA

<sup>d</sup> Shenzhen Research Institute, City University of Hong Kong, Shenzhen 518057, P. R.  
China

†Equal contribution

\*Correspondence to: Prof. Kaili Zhang, Email: kaizhang@cityu.edu.hk; and Prof. Qi  
Liu, Email: qiliu63@cityu.edu.hk

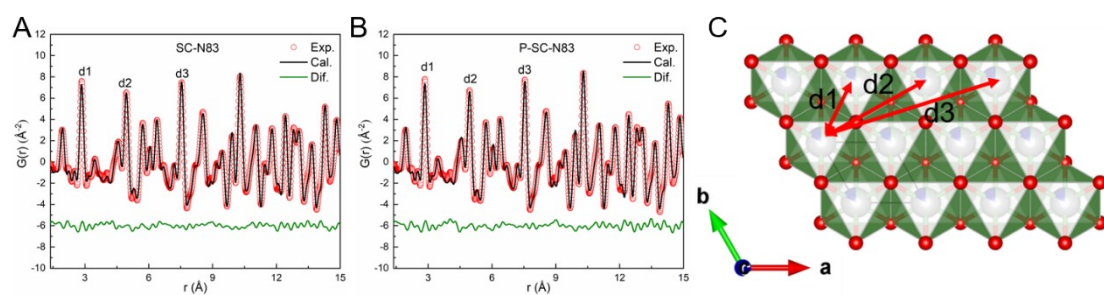

**Supplementary Figure 1.** Full-profile refinement patterns of (a) SC-N83 and (b) P-SC-N83. (c) variation of the three nearest TM-TM distances according to the refinement.

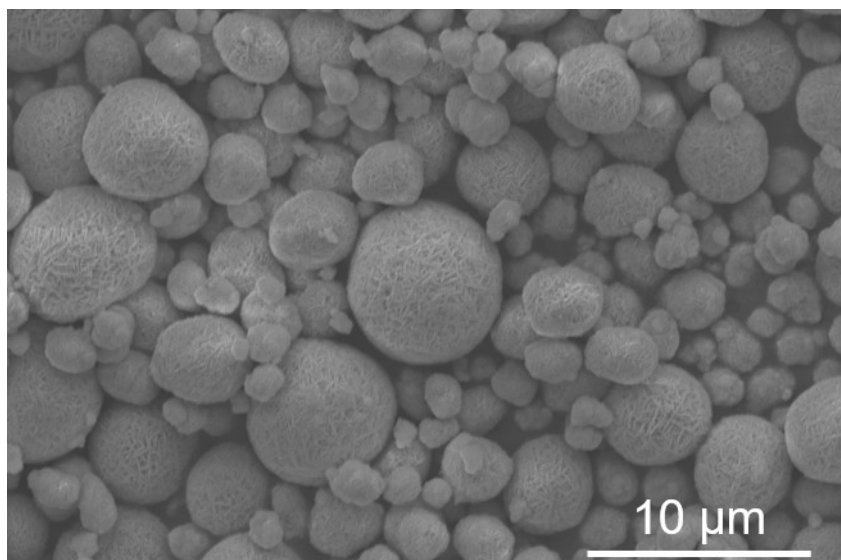

**Supplementary Figure 2.** SEM image of precursor  $\text{Ni}_{0.83}\text{Co}_{0.12}\text{Mn}_{0.05}(\text{OH})_2$ .

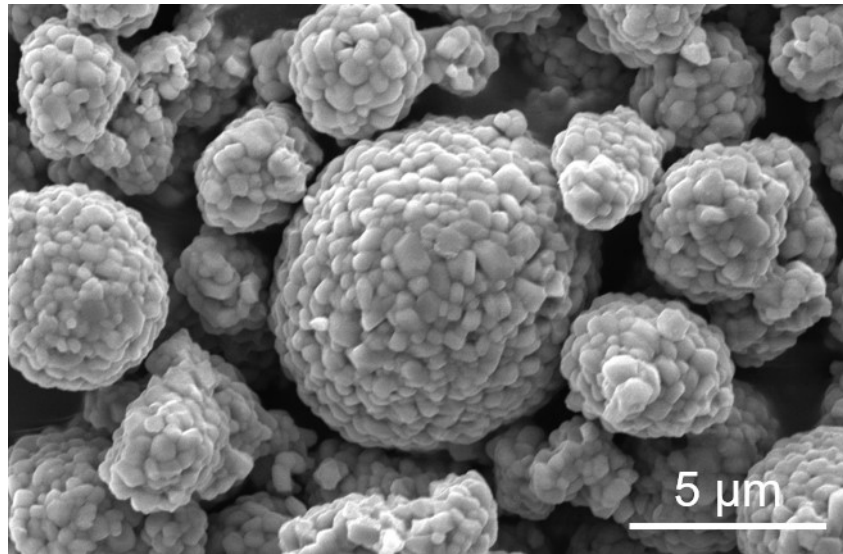

**Supplementary Figure 3.** SEM image of **polycrystalline**  $\text{LiNi}_{0.83}\text{Co}_{0.12}\text{Mn}_{0.5}\text{O}_2$  sintered at 800 °C.

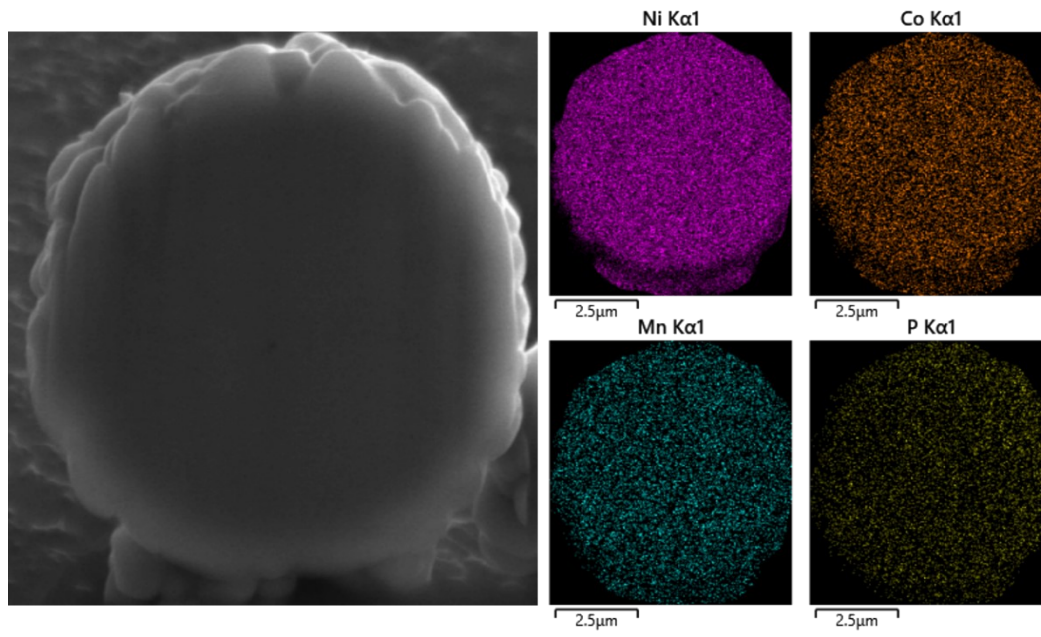

**Supplementary Figure 4.** Cross-sectional elemental distribution of  $\text{LiNi}_{0.83}\text{Co}_{0.12}\text{Mn}_{0.5}\text{O}_2$  after sintering at 880 °C.

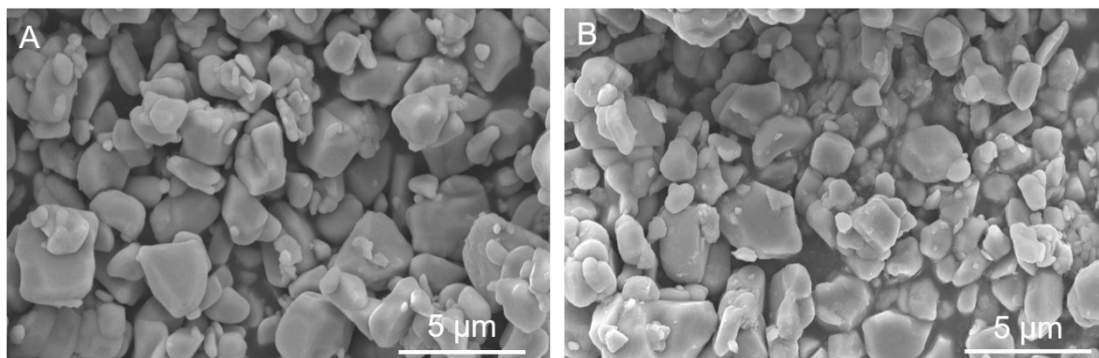

**Supplementary Figure 5.** SEM images of (A) SC-N83 and (B) P-SC-N83 single crystals.

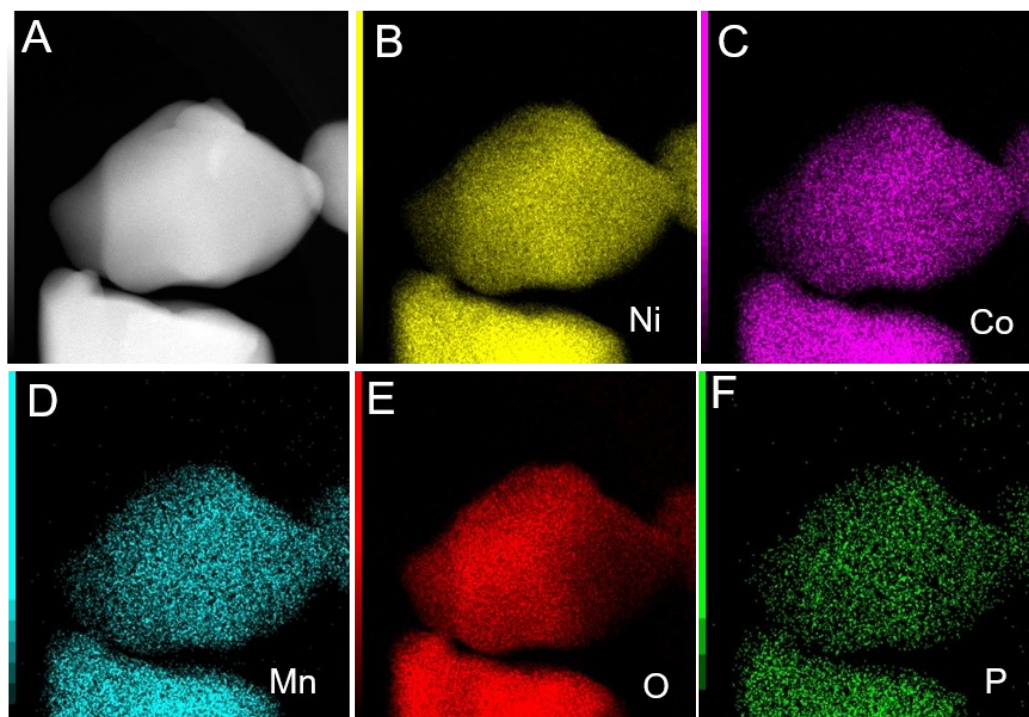

**Supplementary Figure 6.** EDS elemental mapping of Ni, Co, Mn, O, P of P-SC-N83.

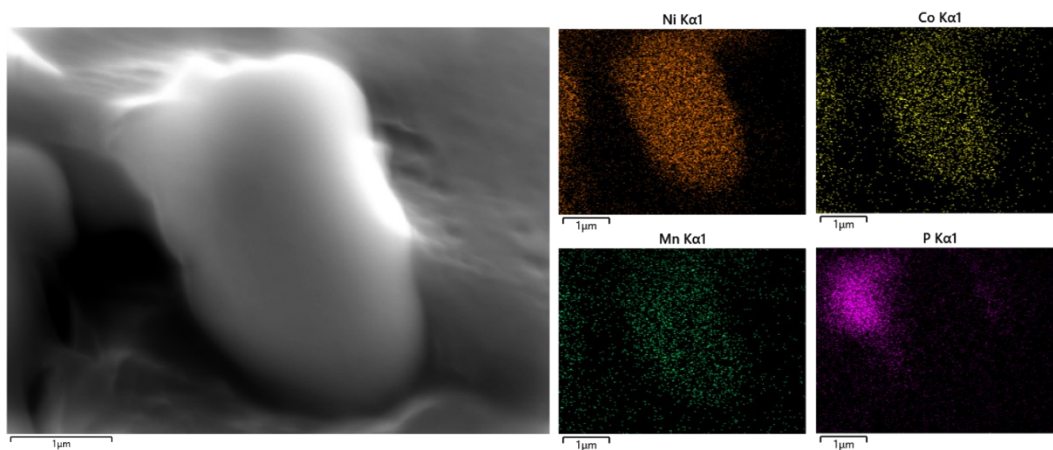

**Supplementary Figure 7.** Cross-sectional elemental distribution of  $\text{LiNi}_{0.83}\text{Co}_{0.12}\text{Mn}_{0.5}\text{O}_2$  by coating directly on single-crystalline particles after the second calcination.



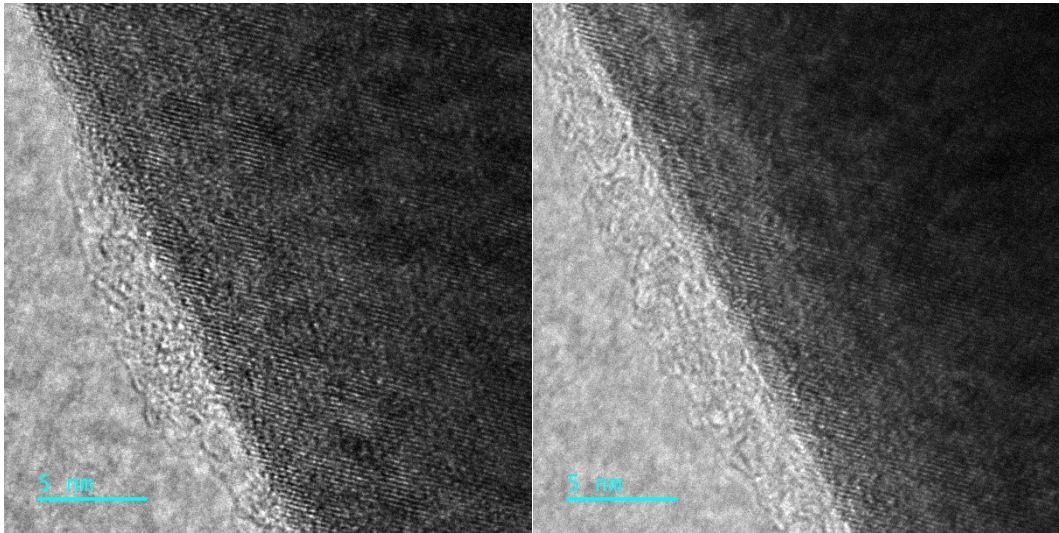

**Supplementary Figure 8.** HR-TEM images of P-SC-N83.

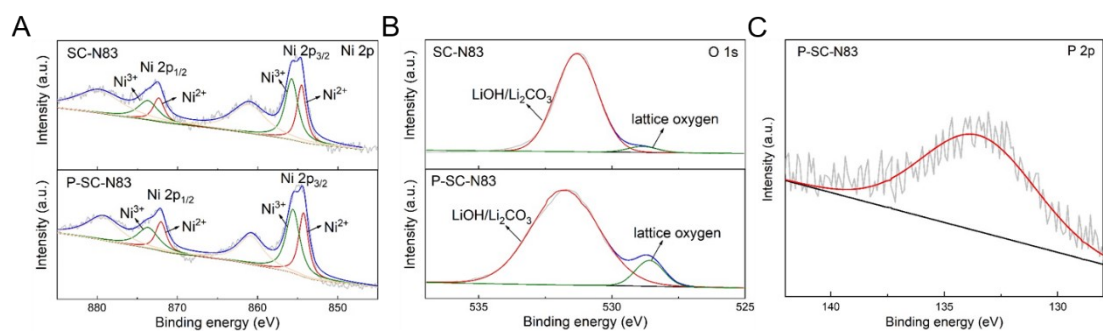

**Supplementary Figure 9.** XPS spectra of (A) Ni 2p, (B) O 1s and (C) P 2p of SC-N83 and P-SC-N83.

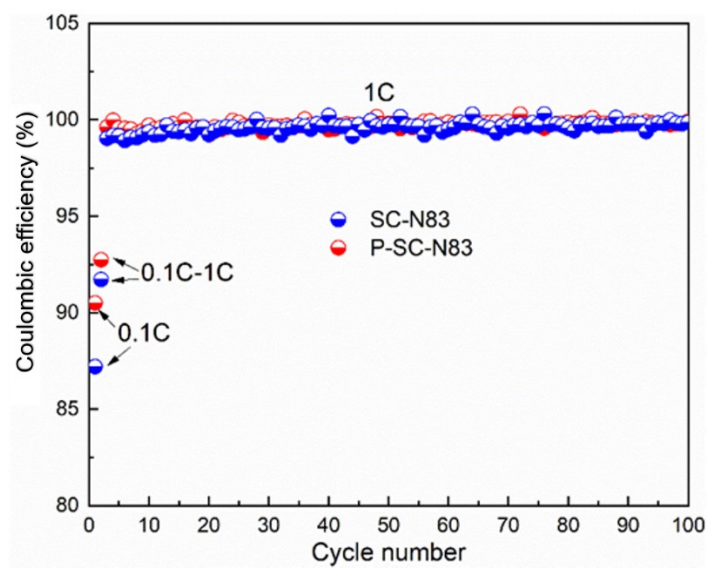

**Supplementary Figure 10.** Coulombic efficiency of SC-N83 and P-SC-N83 in the whole cycling process.

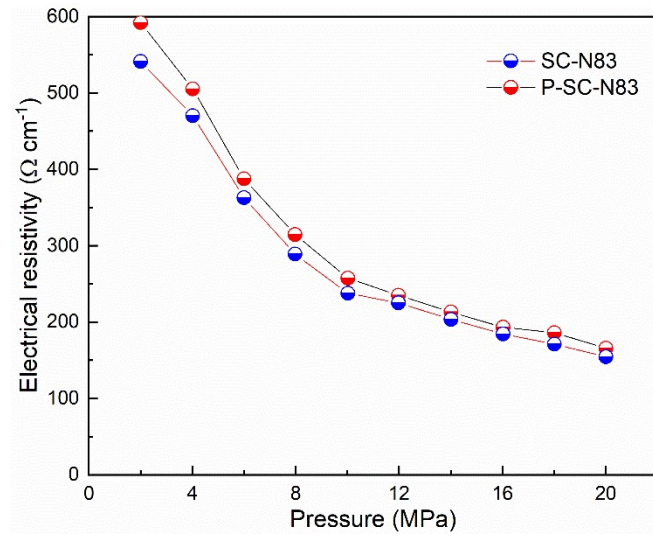

**Supplementary Figure 11.** Powder electrical resistivity of SC-N83 and P-SC-N83 under different pressures.

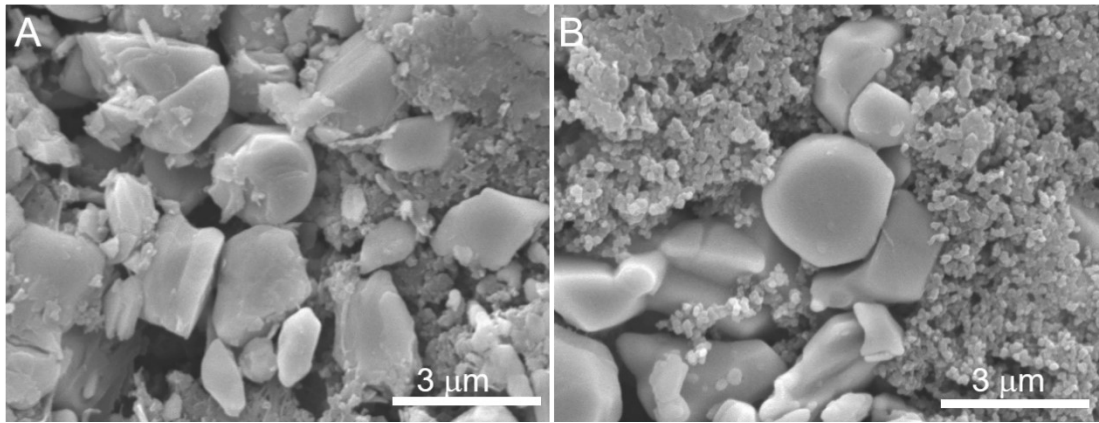

**Supplementary Figure 12.** SEM images of (A) SC-N83 and (B) P-SC-N83 after 100 cycles.

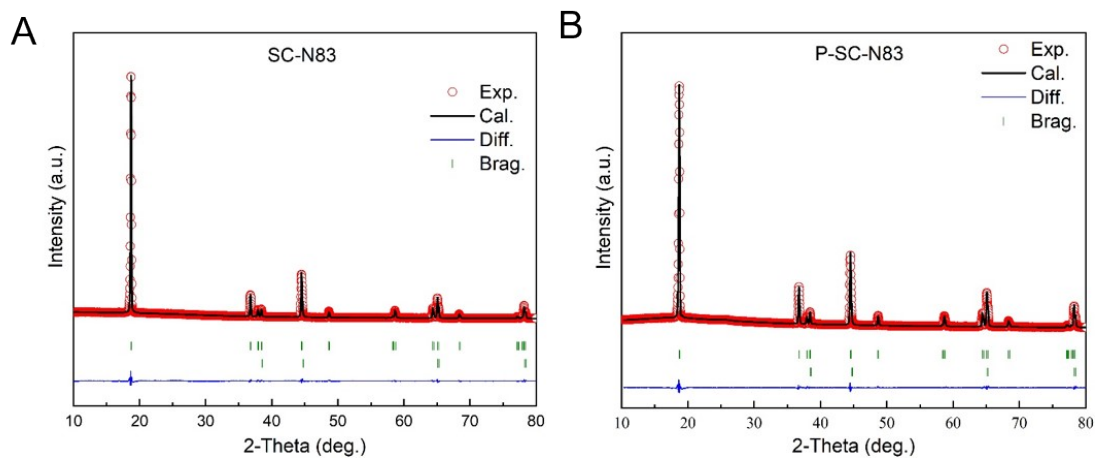

**Supplementary Figure 13.** Full-profile refinement patterns of (A) SC-N83 and (B) P-SC-N83 after 100 cycles.

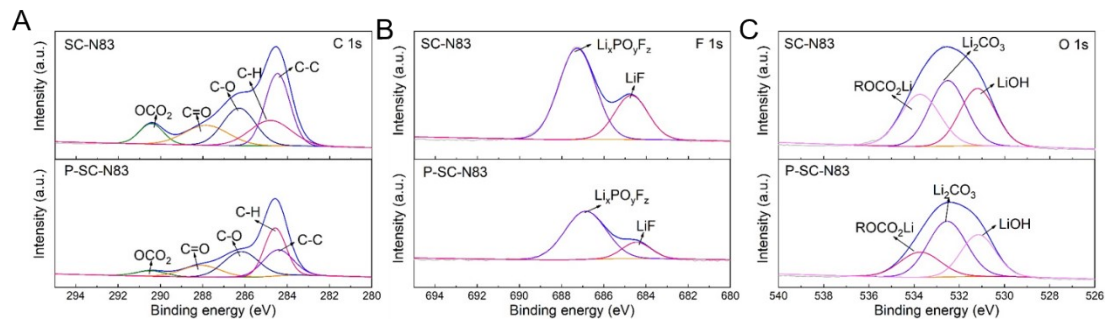

**Supplementary Figure 14.** XPS spectra of (A) C 1s, (B) F 1s and (C) O 1s of SC-N83 and P-SC-N83 after 100 cycles.

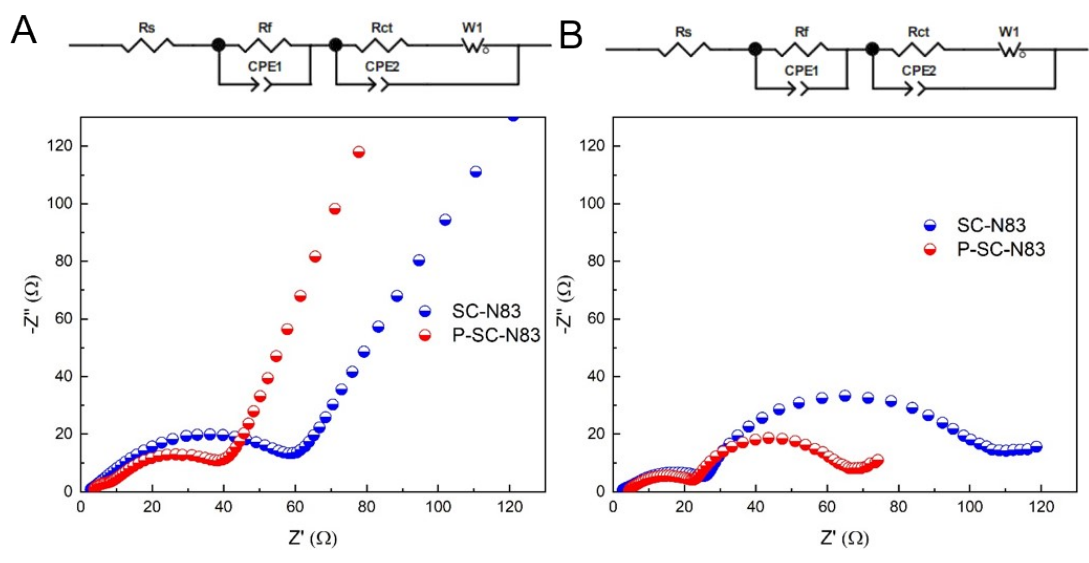

**Supplementary Figure 15.** EIS plots of SC-N83 and P-SC-N83 before (A) and after (B) cycling.



**Supplementary Table 1.** Lattice constants of samples obtained from XRD Rietveld analysis based on the  $R-3m$  space group

| Samples  | a-axis ( $\text{\AA}$ ) | c-axis ( $\text{\AA}$ ) | V ( $\text{\AA}^3$ ) | Li/Ni disorder | R <sub>wp</sub> |
|----------|-------------------------|-------------------------|----------------------|----------------|-----------------|
| SC-N83   | 2.87206                 | 14.18912                | 101.362              | 1.27%          | 5.1             |
| P-SC-N83 | 2.87778                 | 14.20441                | 101.876              | 1.53%          | 6.6             |

**Supplementary Table 2.** Lattice constants of samples after 100 cycles obtained from XRD Rietveld analysis based on the  $R\text{-}3m$  space group

| Samples  | a-axis ( $\text{\AA}$ ) | c-axis ( $\text{\AA}$ ) | V ( $\text{\AA}^3$ ) | R <sub>wp</sub> |
|----------|-------------------------|-------------------------|----------------------|-----------------|
| SC-N83   | 2.86402                 | 14.24207                | 101.171              | 6.9             |
| P-SC-N83 | 2.86460                 | 14.22557                | 101.095              | 6.2             |

**Supplementary Table 3.** EIS plots fitting results according to the given equivalent circuit.

| Samples  | Before cycling |                  | After cycling |                  |
|----------|----------------|------------------|---------------|------------------|
|          | $R_f(\Omega)$  | $R_{ct}(\Omega)$ | $R_f(\Omega)$ | $R_{ct}(\Omega)$ |
| SC-N83   | 6.95           | 49.61            | 23.63         | 83.88            |
| P-SC-N83 | 6.84           | 29.19            | 18.75         | 45.29            |
